# Supplementary material for: Distinct signatures of dental plaque metabolic byproducts dictated by periodontal inflammatory status
Source: PubMed Central journal article supplement (PMC5318866; doi:10.1038/srep42818), 2017-02-21
Supplement: srep42818-s1.pdf [file srep42818-s1.pdf]

## Supplementary Information for:

### Distinct signatures of dental plaque metabolic byproducts dictated by periodontal inflammatory status

**Akito Sakanaka<sup>1</sup>, Masae Kuboniwa<sup>1,2,\*</sup>, Ei Hashino<sup>1,3</sup>, Takeshi Bamba<sup>4,5</sup>, Eiichiro Fukusaki<sup>2,5</sup>, Atsuo Amano<sup>1</sup>**

<sup>1</sup>Department of Preventive Dentistry, Osaka University Graduate School of Dentistry, 1–8 Yamadaoka, Suita, Osaka 565–0871, Japan

<sup>2</sup>AMED-CREST, Japan Agency for Medical Research and Development, 1-7-1 Otemachi, Chiyoda-ku, Tokyo, 100-0004, Japan

<sup>3</sup>Project ‘Challenge to Intractable Oral Disease’, Osaka University Dental Hospital; 1-8 Yamadaoka, Suita, Osaka 565-0871, Japan

<sup>4</sup>Division of Metabolomics, Research Center for Transomics Medicine, Medical Institute of Bioregulation, Kyushu University, 3-1-1 Maidashi, Higashi-ku, Fukuoka 812-8582, Japan

<sup>5</sup>Department of Biotechnology, Osaka University Graduate School of Engineering, 1–8 Yamadaoka, Suita, Osaka 565–0871, Japan

**\*Corresponding author:**

Email: [kuboniwa@dent.osaka-u.ac.jp](mailto:kuboniwa@dent.osaka-u.ac.jp)

**Supplementary Table S1. Peak information of metabolites in saliva**

| Peak No. | RT (sec) | RI       | Quantitative <i>m/z</i> | Compound Name              | KEGG compound     | Peak area          |        |                   |       | Ratio (after/before) | <i>p</i> value <sup>a</sup> |
|----------|----------|----------|-------------------------|----------------------------|-------------------|--------------------|--------|-------------------|-------|----------------------|-----------------------------|
|          |          |          |                         |                            |                   | before debridement |        | after debridement |       |                      |                             |
|          |          |          |                         |                            |                   | Average            | S. D.  | Average           | S. D. |                      |                             |
| 1        | 273.3    | 1001.154 | 117                     | Propylene glycol           | C00583            | 2.41               | 1.73   | 2.69              | 1.92  | 1.1                  | 0.331                       |
| 2        | 305.6    | 1048.92  | 174                     | Oxalacetic acid + Pyruvate | C00022+<br>C00036 | 13.12              | 8.73   | 13.97             | 6.29  | 1.1                  | 0.509                       |
| 3        | 344.2    | 1106.248 | 116                     | Alanine_2TMS               | C00041            | 48.69              | 33.23  | 35.81             | 21.58 | 0.7                  | 0.005 *                     |
| 4        | 360.8    | 1131.794 | 131                     | 2-Hydroxybutyrate          | C05984            | 2.35               | 1.74   | 3.29              | 2.33  | 1.4                  | 0.001 *                     |
| 5        | 366.9    | 1141.182 | 116                     | Sarcosine                  | C00213            | 4.16               | 2.66   | 4.73              | 3.88  | 1.1                  | 0.278                       |
| 6        | 377.9    | 1158.11  | 86                      | Leucine_1TMS               | C00123            | 7.59               | 6.22   | 4.18              | 2.13  | 0.6                  | 0.000 *                     |
| 7        | 390.5    | 1177.501 | 130                     | 2-Aminobutyric acid        | C02261            | 1.87               | 1.02   | 2.00              | 0.92  | 1.1                  | 0.327                       |
| 8        | 391.7    | 1179.347 | 86                      | Isoleucine_1TMS            | C00407            | 3.31               | 3.63   | 1.46              | 0.93  | 0.4                  | 0.001 *                     |
| 9        | 419.1    | 1223.115 | 144                     | Valine                     | C00183            | 17.23              | 14.16  | 16.03             | 10.84 | 0.9                  | 0.511                       |
| 10       | 443.3    | 1263.128 | 132                     | Serine_2TMS                | C00065            | 7.14               | 5.67   | 6.37              | 4.75  | 0.9                  | 0.385                       |
| 11       | 451      | 1275.86  | 174                     | Ethanolamine               | C00189            | 44.47              | 27.28  | 40.70             | 22.23 | 0.9                  | 0.306                       |
| 12       | 453      | 1279.167 | 158                     | Leucine_2TMS               | C00123            | 12.76              | 11.49  | 12.38             | 7.95  | 1.0                  | 0.810                       |
| 13       | 466.7    | 1301.959 | 158                     | Isoleucine_2TMS            | C00407            | 5.26               | 6.03   | 3.18              | 2.55  | 0.6                  | 0.015 *                     |
| 14       | 469.5    | 1306.944 | 142                     | Proline                    | C00148            | 63.92              | 60.24  | 84.27             | 81.34 | 1.3                  | 0.060                       |
| 15       | 474.5    | 1315.848 | 147                     | Succinic acid              | C00042            | 70.45              | 51.43  | 52.33             | 28.95 | 0.7                  | 0.026 *                     |
| 16       | 475.4    | 1317.45  | 174                     | Glycine                    | C00037            | 186.60             | 112.46 | 159.41            | 98.87 | 0.9                  | 0.127                       |
| 17       | 487.9    | 1339.708 | 189                     | Glyceric acid              | C00258            | 1.39               | 1.26   | 1.15              | 0.88  | 0.8                  | 0.128                       |
| 18       | 504.6    | 1369.444 | 204                     | Serine_3TMS                | C00065            | 6.82               | 6.85   | 3.70              | 3.76  | 0.5                  | 0.002 *                     |
| 19       | 506.3    | 1372.472 | 188                     | Alanine_3TMS               | C00041            | 5.59               | 4.83   | 3.34              | 2.12  | 0.6                  | 0.001 *                     |
| 20       | 520.5    | 1397.756 | 218                     | Threonine                  | C00188            | 2.14               | 1.62   | 1.67              | 0.85  | 0.8                  | 0.027 *                     |
| 21       | 527      | 1409.981 | 255                     | Thymine                    | C00178            | 1.17               | 0.76   | 1.10              | 0.52  | 0.9                  | 0.466                       |

|    |       |          |     |                              |                   |        |        |        |        |     |       |   |
|----|-------|----------|-----|------------------------------|-------------------|--------|--------|--------|--------|-----|-------|---|
| 22 | 534.1 | 1423.505 | 104 | Hydrocinnamate_NIST          | C05629            | 11.67  | 9.98   | 11.05  | 9.03   | 0.9 | 0.337 |   |
| 23 | 541.2 | 1437.029 | 248 | b-Alanine                    | C00099            | 1.24   | 0.58   | 1.03   | 0.50   | 0.8 | 0.010 | * |
| 24 | 589.1 | 1530.163 | 232 | Aspartic acid                | C00049            | 19.99  | 15.90  | 12.24  | 8.39   | 0.6 | 0.000 | * |
| 25 | 590.7 | 1533.415 | 156 | 5-Oxoproline                 | C01879            | 47.14  | 25.60  | 25.19  | 10.57  | 0.5 | 0.000 | * |
| 26 | 594.8 | 1541.748 | 174 | 4-Aminobutyric acid          | C00334            | 2.47   | 1.72   | 1.77   | 1.36   | 0.7 | 0.000 | * |
| 27 | 610.6 | 1573.862 | 115 | Creatinine                   | C00791            | 1.56   | 1.19   | 1.62   | 1.04   | 1.0 | 0.611 |   |
| 28 | 622.5 | 1598.049 | 193 | 3-Phenyllactic acid          | C05607            | 1.27   | 0.66   | 1.08   | 0.51   | 0.9 | 0.013 | * |
| 29 | 631.1 | 1616.451 | 188 | Hypotaurine                  | C00519            | 2.78   | 1.88   | 2.27   | 1.41   | 0.8 | 0.005 | * |
| 30 | 636.8 | 1628.725 | 246 | Glutamic acid                | C00302            | 33.20  | 29.07  | 18.04  | 12.01  | 0.5 | 0.000 | * |
| 31 | 642.4 | 1640.784 | 174 | 5-Aminovaleric acid          | C00431            | 424.98 | 235.97 | 340.20 | 176.38 | 0.8 | 0.009 | * |
| 32 | 643.1 | 1642.291 | 218 | Phenylalanine                | C00079            | 18.51  | 11.89  | 13.83  | 6.81   | 0.7 | 0.002 | * |
| 33 | 645.4 | 1647.244 | 179 | 4-Hydroxyphenylacetic acid   | C00642            | 6.65   | 5.84   | 6.04   | 5.19   | 0.9 | 0.206 |   |
| 34 | 648.3 | 1653.488 | 257 | Lauric acid                  | C02679            | 0.79   | 0.53   | 1.41   | 1.08   | 1.8 | 0.000 | * |
| 35 | 669.8 | 1699.785 | 103 | Ribose                       | C00121            | 2.25   | 2.19   | 2.17   | 1.94   | 1.0 | 0.839 |   |
| 36 | 694.4 | 1755.707 | 117 | Fucose_1                     | C01018            | 79.62  | 76.14  | 47.21  | 36.73  | 0.6 | 0.002 | * |
| 37 | 695.7 | 1758.663 | 174 | Putrescine                   | C00134            | 154.88 | 104.38 | 122.79 | 77.66  | 0.8 | 0.005 | * |
| 38 | 700.4 | 1769.35  | 117 | Fucose_2                     | C01018            | 21.29  | 22.31  | 10.83  | 10.07  | 0.5 | 0.000 | * |
| 39 | 707.4 | 1785.266 | 156 | Glutamine                    | C00064            | 16.35  | 17.86  | 7.96   | 5.82   | 0.5 | 0.001 | * |
| 40 | 715.5 | 1803.868 | 174 | O-Phosphoethanolamine        | C00346            | 29.97  | 27.42  | 37.56  | 25.85  | 1.3 | 0.011 | * |
| 41 | 721.4 | 1817.956 | 204 | Shikimic acid                | C00493            | 2.26   | 1.89   | 2.15   | 1.90   | 0.9 | 0.743 |   |
| 42 | 722.1 | 1819.628 | 265 | Hypoxanthine                 | C00262            | 2.41   | 1.99   | 3.06   | 2.06   | 1.3 | 0.094 |   |
| 43 | 729.5 | 1837.297 | 142 | Ornithine_NIST               | C00077            | 47.84  | 36.23  | 35.74  | 24.03  | 0.7 | 0.008 | * |
| 44 | 730.1 | 1838.73  | 273 | Isocitric acid + Citric acid | C00311+<br>C00158 | 14.87  | 15.61  | 21.12  | 14.23  | 1.4 | 0.000 | * |
| 45 | 737.9 | 1857.354 | 174 | Cadaverine                   | C01672            | 45.57  | 37.10  | 35.83  | 30.10  | 0.8 | 0.019 | * |
| 46 | 741.6 | 1866.189 | 194 | Caffeine                     | C07481            | 3.36   | 3.02   | 3.10   | 2.79   | 0.9 | 0.253 |   |

|    |        |          |     |                         |        |        |       |        |       |     |       |   |
|----|--------|----------|-----|-------------------------|--------|--------|-------|--------|-------|-----|-------|---|
| 47 | 746    | 1876.695 | 217 | 1,5-Anhydro glucitol    | C07326 | 3.14   | 2.10  | 4.36   | 2.29  | 1.4 | 0.000 | * |
| 48 | 749.3  | 1884.575 | 264 | Adenine                 | C00147 | 1.12   | 0.58  | 1.13   | 0.51  | 1.0 | 0.903 |   |
| 49 | 761.4  | 1914.157 | 103 | Fructose                | C00085 | 3.34   | 13.69 | 0.74   | 1.64  | 0.2 | 0.183 |   |
| 50 | 766.3  | 1926.456 | 205 | Galactose               | C00124 | 15.47  | 8.80  | 11.95  | 7.30  | 0.8 | 0.004 | * |
| 51 | 768.8  | 1932.731 | 205 | Glucose                 | C00031 | 14.00  | 17.67 | 19.52  | 20.52 | 1.4 | 0.011 | * |
| 52 | 771.4  | 1939.257 | 174 | Lysine                  | C00047 | 40.71  | 27.10 | 35.22  | 23.11 | 0.9 | 0.151 |   |
| 53 | 771.7  | 1940.01  | 154 | Histidine               | C00135 | 14.81  | 11.98 | 12.21  | 10.23 | 0.8 | 0.204 |   |
| 54 | 778.8  | 1957.831 | 218 | Tyrosine                | C00082 | 82.69  | 47.31 | 71.88  | 36.29 | 0.9 | 0.104 |   |
| 55 | 788.1  | 1981.175 | 237 | Paraxanthine            | C13747 | 3.80   | 3.18  | 5.11   | 4.23  | 1.3 | 0.002 | * |
| 56 | 789.2  | 1983.936 | 202 | Indole-3-acetic acid    | C00954 | 3.43   | 3.12  | 2.06   | 1.53  | 0.6 | 0.000 | * |
| 57 | 799.4  | 2009.974 | 174 | N-Acetylmethionine      | C00437 | 16.70  | 20.92 | 10.81  | 10.24 | 0.6 | 0.026 | * |
| 58 | 810.1  | 2038.058 | 353 | Xanthine                | C00385 | 1.98   | 1.94  | 2.59   | 2.17  | 1.3 | 0.135 |   |
| 59 | 841.2  | 2120.593 | 205 | N-Acetylgalactosamine   | C00203 | 1.08   | 0.97  | 1.01   | 0.89  | 0.9 | 0.621 |   |
| 60 | 842.9  | 2125.261 | 441 | Uric acid               | C00366 | 116.50 | 71.67 | 130.39 | 72.67 | 1.1 | 0.094 |   |
| 61 | 846    | 2133.773 | 217 | Inositol                | C00137 | 7.99   | 3.40  | 8.79   | 3.12  | 1.1 | 0.062 | * |
| 62 | 850.2  | 2145.305 | 315 | Arabinose-5-phosphate   | C01112 | 1.07   | 0.78  | 0.98   | 0.53  | 0.9 | 0.428 |   |
| 63 | 887.6  | 2250.143 | 202 | Tryptophan              | C00078 | 2.58   | 2.38  | 1.31   | 0.64  | 0.5 | 0.000 | * |
| 64 | 900.4  | 2286.862 | 144 | Spermidine              | C00315 | 1.99   | 1.50  | 1.86   | 1.20  | 0.9 | 0.449 |   |
| 65 | 929    | 2371.744 | 387 | Fructose 6-phosphate    | C00085 | 1.45   | 1.19  | 1.11   | 0.75  | 0.8 | 0.056 |   |
| 66 | 1030.3 | 2695.909 | 246 | N-Acetylneuraminic acid | C00270 | 8.83   | 7.12  | 8.79   | 7.82  | 1.0 | 0.969 |   |
| 67 | 1054.6 | 2779.972 | 204 | β-Lactose               | C01970 | 0.97   | 1.09  | 2.07   | 3.24  | 2.1 | 0.015 | * |
| 68 | 1074.5 | 2850.609 | 361 | Maltose                 | C00208 | 3.89   | 3.48  | 4.82   | 4.15  | 1.2 | 0.183 |   |
| 69 | 1074.8 | 2851.685 | 204 | Lactitol                | C13542 | 1.62   | 3.25  | 1.19   | 2.11  | 0.7 | 0.091 |   |

<sup>a\*</sup>  $p < 0.05$

**Supplementary Table S2. Metabolite set list**

| <b>Metabolic pathway tested</b>                     | <b>Metabolites classified in each metabolic pathway<sup>a</sup></b>                                                        |
|-----------------------------------------------------|----------------------------------------------------------------------------------------------------------------------------|
| Alanine, aspartate, asparagine metabolism           | Alanine, Aspartic acid                                                                                                     |
| Arginine and proline metabolism                     | 4-Aminobutyric acid, 5-Aminovaleric acid, Creatinine, Glutamic acid, Ornithine, Proline, Putrescine, Sarcosine, Spermidine |
| Biotin metabolism                                   | Lysine, Pyruvate                                                                                                           |
| Butyric acid metabolism                             | 4-Aminobutyric acid, Succinic acid                                                                                         |
| Caffeine metabolism                                 | Caffeine, Paraxanthine, Xanthine                                                                                           |
| Citrate cycle (TCA cycle)                           | Citric acid, Pyruvate, Succinic acid                                                                                       |
| Cysteine and methionine metabolism                  | Alanine, Aspartic acid, Pyruvate, Serine                                                                                   |
| Fructose and mannose metabolism                     | Fructose, Fructose 6-phosphate, Fucose                                                                                     |
| Glutamate, glutamine metabolism                     | 4-Aminobutyric acid, 5-Oxoproline, Glutamic acid, Glutamine, Succinic acid                                                 |
| Glutathione metabolism                              | 5-Oxoproline, Cadaverine, Glutamic acid, Glycine, Ornithine, Putrescine, Spermidine                                        |
| Glycine, serine and threonine metabolism            | Aspartic acid, Glyceric acid, Glycine, Sarcosine, Serine, Threonine, Tryptophan                                            |
| Glycolysis / Gluconeogenesis                        | Fructose 6-phosphate, Glucose, Pyruvate                                                                                    |
| Glyoxylate and dicarboxylate metabolism             | Citric acid, Glutamine, Glyceric acid, Glycine, Pyruvate, Serine                                                           |
| Histidine metabolism                                | Aspartic acid, Histidine                                                                                                   |
| Lysine biosynthesis                                 | Aspartic acid, Lysine                                                                                                      |
| Lysine degradation                                  | 5-Aminovaleric acid, Cadaverine, Lysine                                                                                    |
| Nicotinic acid metabolism                           | Aspartic acid, Pyruvate                                                                                                    |
| Pentose phosphate pathway                           | Fructose 6-phosphate, Glucose, Glyceric acid, Pyruvate                                                                     |
| Phenylalanine metabolism                            | 3-Phenyllactic acid, 4-Hydroxyphenylacetic acid, Hydrocinnamate, Phenylalanine                                             |
| Phenylalanine, tyrosine and tryptophan biosynthesis | Phenylalanine, Shikimic acid, Tryptophan, Tyrosine                                                                         |
| Polyamine metabolism                                | 4-Aminobutyric acid, Cadaverine, Ornithine, Putrescine, Spermidine                                                         |
| Propionic acid metabolism                           | 2-Hydroxybutyrate, b-Alanine, Propyleneglycol                                                                              |

|                                             |                                                                              |
|---------------------------------------------|------------------------------------------------------------------------------|
| Purine metabolism                           | Adenine, Glutamine, Glycine, Hypoxanthine, Xanthine                          |
| Pyrimidine metabolism                       | b-Alanine, Glutamine, Thymine                                                |
| Pyruvate metabolism                         | Pyruvate                                                                     |
| Tryptophan metabolism                       | Indole-3-acetic acid, Tryptophan                                             |
| Tyrosine metabolism                         | 4-Hydroxyphenylacetic acid, Phenylalanine, Pyruvate, Succinic acid, Tyrosine |
| Valine, leucine and isoleucine biosynthesis | Isoleucine, Leucine, Threonine, Valine                                       |
| Valine, leucine and isoleucine degradation  | Isoleucine, Leucine, Valine                                                  |

<sup>a</sup>Detected metabolites are listed with high-PISA-specific metabolites gray-highlighted in each pathway.

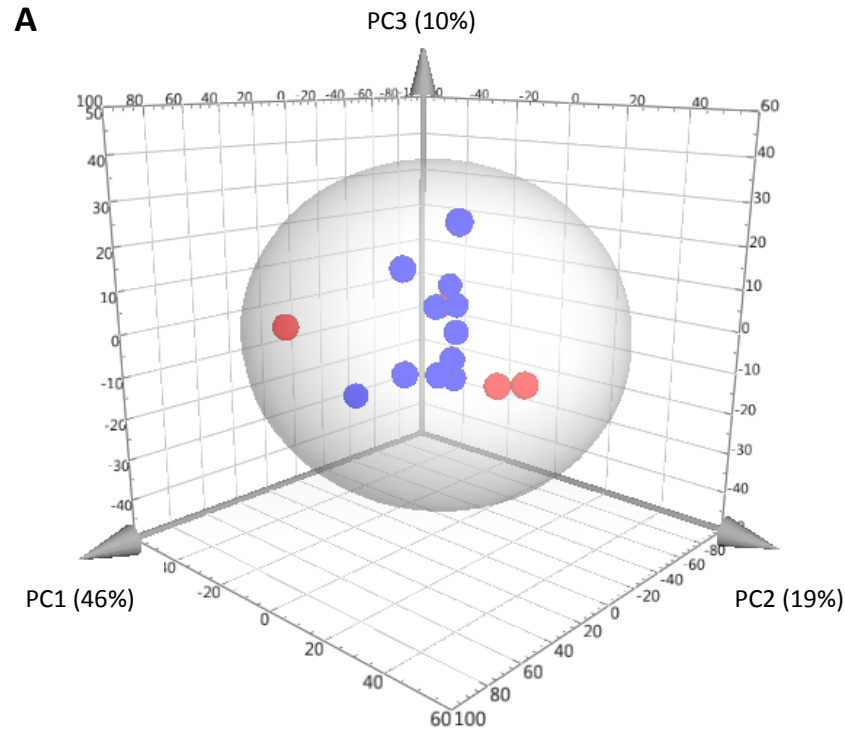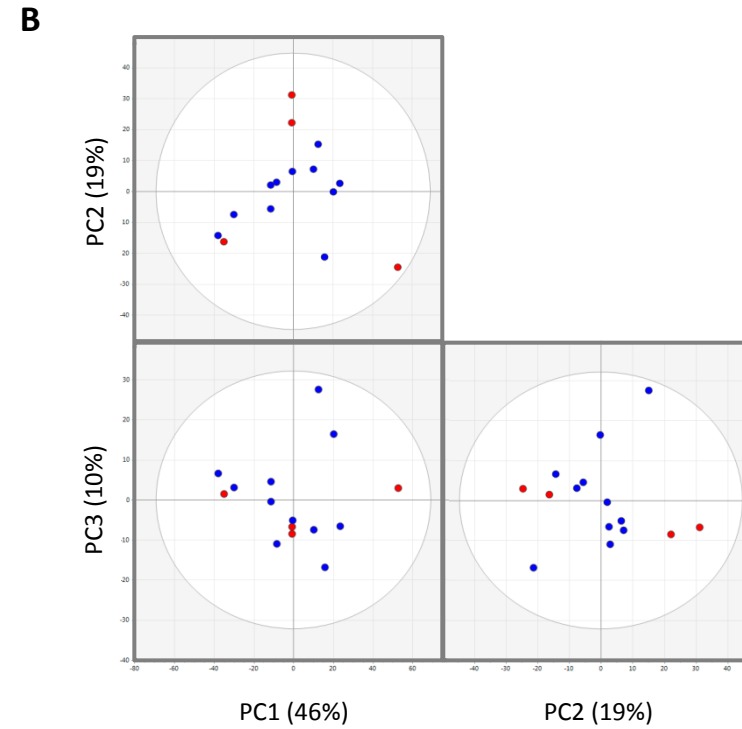

**Supplementary Figure S1. Score plots of principal component analysis on gender distribution in high PISA group.** Three-dimensional (A) and 2-dimensional (B) PC plots are shown. A total of 11 and 4 male and female subjects were included in high PISA group. The values for males and females are colored blue and red, respectively.

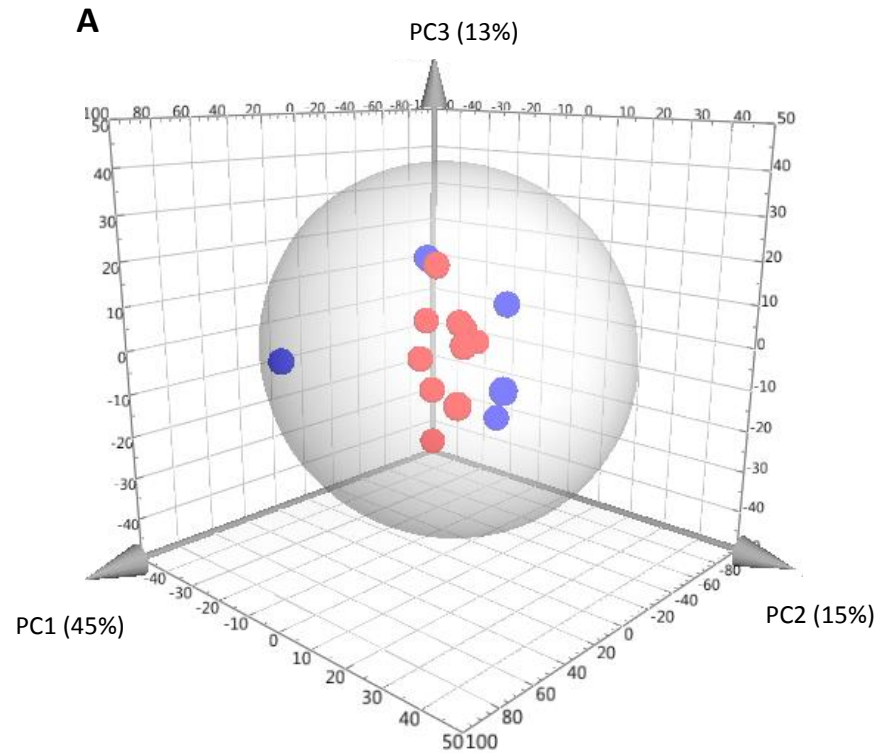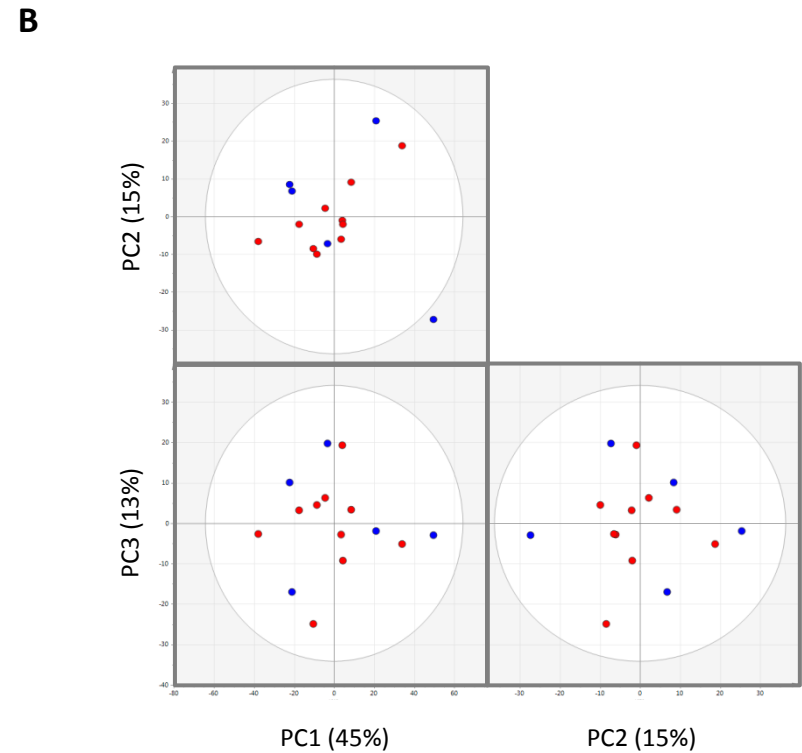

**Supplementary Figure S2. Score plots of principal component analysis on gender distribution in low PISA group.** Three-dimensional (A) and 2-dimensional (B) PC plots are shown. A total of 5 and 10 male and female subjects were included in low PISA group. The values for males and females are colored blue and red, respectively.



**Supplementary Table S3. Comparison of the average peak intensity values of pre-debridement salivary metabolites according to gender**

| Metabolite                 | M/F <sup>a</sup> | <i>p</i> value <sup>b</sup> |   |
|----------------------------|------------------|-----------------------------|---|
| Propylene glycol           | 1.18             | 0.133                       |   |
| Oxalacetic acid + Pyruvate | 1.21             | 0.900                       |   |
| Alanine_2TMS               | 1.35             | 0.318                       |   |
| 2-Hydroxybutyrate          | 1.31             | 0.109                       |   |
| Sarcosine                  | 0.764            | 0.148                       |   |
| Leucine_1TMS               | 1.14             | 0.554                       |   |
| 2-Aminobutyric acid        | 1.23             | 0.443                       |   |
| Isoleucine_1TMS            | 1.14             | 0.421                       |   |
| Valine                     | 1.20             | 0.421                       |   |
| Serine_2TMS                | 1.40             | 0.318                       |   |
| Ethanolamine               | 0.932            | 0.808                       |   |
| Leucine_2TMS               | 1.28             | 0.554                       |   |
| Isoleucine_2TMS            | 1.29             | 0.648                       |   |
| Proline                    | 1.29             | 0.503                       |   |
| Succinic acid              | 1.28             | 0.190                       |   |
| Glycine                    | 1.18             | 0.455                       |   |
| Glyceric acid              | 1.84             | 0.076                       |   |
| Serine_3TMS                | 1.57             | 0.432                       |   |
| Alanine_3TMS               | 1.37             | 0.165                       |   |
| Threonine                  | 1.40             | 0.607                       |   |
| Thymine                    | 1.22             | 0.421                       |   |
| Hydrocinnamate             | 1.17             | 0.467                       |   |
| b-Alanine                  | 1.35             | 0.017                       | * |

|                              |       |         |
|------------------------------|-------|---------|
| Aspartic acid                | 1.40  | 0.318   |
| 5-Oxoproline                 | 1.16  | 0.432   |
| 4-Aminobutyric acid          | 0.993 | 0.778   |
| Creatinine                   | 0.877 | 0.047 * |
| 3-Phenyllactic acid          | 1.06  | 0.421   |
| Hypotaurine                  | 1.04  | 0.648   |
| Glutamic acid                | 1.41  | 0.218   |
| 5-Aminovaleric acid          | 0.983 | 0.778   |
| Phenylalanine                | 1.12  | 0.691   |
| 4-Hydroxyphenylacetic acid   | 1.06  | 0.607   |
| Lauric acid                  | 0.983 | 0.808   |
| Ribose                       | 1.81  | 0.059   |
| Fucose_1                     | 1.04  | 0.677   |
| Putrescine                   | 0.939 | 0.764   |
| Fucose_2                     | 1.07  | 0.778   |
| Glutamine                    | 1.10  | 0.992   |
| O-Phosphoethanolamine        | 1.05  | 0.479   |
| Shikimic acid                | 1.32  | 0.299   |
| Hypoxanthine                 | 1.24  | 0.621   |
| Ornithine                    | 1.11  | 0.677   |
| Isocitric acid + Citric acid | 1.09  | 0.854   |
| Cadaverine                   | 1.53  | 0.105   |
| Caffeine                     | 1.13  | 0.118   |
| 1,5-Anhydro glucitol         | 1.07  | 0.691   |
| Adenine                      | 1.08  | 0.869   |

|                         |       |       |
|-------------------------|-------|-------|
| Fructose                | 12.1  | 0.734 |
| Galactose               | 1.10  | 0.808 |
| Glucose                 | 1.44  | 0.101 |
| Lysine                  | 1.36  | 0.143 |
| Histidine               | 1.28  | 0.109 |
| Tyrosine                | 1.04  | 0.662 |
| Paraxanthine            | 0.951 | 0.869 |
| Indole-3-acetic acid    | 1.23  | 0.778 |
| N-Acetylmethionine      | 1.50  | 0.479 |
| Xanthine                | 1.27  | 0.594 |
| N-Acetylgalactosamine   | 1.33  | 0.594 |
| Uric acid               | 1.09  | 0.720 |
| Inositol                | 1.04  | 0.915 |
| Arabinose-5-phosphate   | 1.60  | 0.101 |
| Tryptophan              | 1.56  | 0.290 |
| Spermidine              | 1.10  | 0.823 |
| Fructose 6-phosphate    | 1.46  | 0.184 |
| N-Acetylneuraminic acid | 0.854 | 0.884 |
| $\beta$ -Lactose        | 0.916 | 0.749 |
| Maltose                 | 1.40  | 0.204 |
| Lactitol                | 1.38  | 0.240 |

<sup>a</sup>M/F: the ratio of the average peak intensity values between samples from male and female subjects

<sup>b</sup>The  $p$  values were calculated by the Mann-Whitney test. \* $p < 0.05$

**Supplementary Table S4. Comparison of the average fold changes of salivary metabolites (pre-/post-debridement) according to gender**

| Metabolite                 | M/F <sup>a</sup> | <i>p</i> value <sup>b</sup> |
|----------------------------|------------------|-----------------------------|
| Propylene glycol           | 0.978            | 0.900                       |
| Oxalacetic acid + Pyruvate | 1.24             | 0.233                       |
| Alanine_2TMS               | 1.04             | 0.467                       |
| 2-Hydroxybutyrate          | 0.656            | 0.290                       |
| Sarcosine                  | 0.807            | 0.580                       |
| Leucine_1TMS               | 1.08             | 0.528                       |
| 2-Aminobutyric acid        | 1.10             | 0.290                       |
| Isoleucine_1TMS            | 0.903            | 0.541                       |
| Valine                     | 1.05             | 0.648                       |
| Serine_2TMS                | 1.11             | 0.635                       |
| Ethanolamine               | 0.954            | 0.705                       |
| Leucine_2TMS               | 0.998            | 0.528                       |
| Isoleucine_2TMS            | 0.729            | 0.869                       |
| Proline                    | 0.888            | 0.705                       |
| Succinic acid              | 1.04             | 0.946                       |
| Glycine                    | 0.953            | 0.930                       |
| Glyceric acid              | 1.27             | 0.035                       |
| Serine_3TMS                | 1.08             | 0.977                       |
| Alanine_3TMS               | 1.38             | 0.290                       |
| Threonine                  | 0.983            | 0.854                       |
| Thymine                    | 1.20             | 0.337                       |
| Hydrocinnamate             | 0.963            | 0.808                       |
| b-Alanine                  | 1.06             | 0.479                       |

|                              |       |       |
|------------------------------|-------|-------|
| Aspartic acid                | 0.982 | 0.946 |
| 5-Oxoproline                 | 0.961 | 0.691 |
| 4-Aminobutyric acid          | 1.11  | 0.662 |
| Creatinine                   | 0.86  | 0.327 |
| 3-Phenyllactic acid          | 1.11  | 0.282 |
| Hypotaurine                  | 0.949 | 0.884 |
| Glutamic acid                | 0.938 | 0.677 |
| 5-Aminovaleric acid          | 2.01  | 0.554 |
| Phenylalanine                | 1.08  | 0.528 |
| 4-Hydroxyphenylacetic acid   | 2.03  | 0.749 |
| Lauric acid                  | 1.13  | 0.290 |
| Ribose                       | 1.18  | 0.621 |
| Fucose_1                     | 0.958 | 0.992 |
| Putrescine                   | 2.16  | 0.839 |
| Fucose_2                     | 1.01  | 0.528 |
| Glutamine                    | 0.67  | 0.357 |
| O-Phosphoethanolamine        | 1.17  | 0.734 |
| Shikimic acid                | 0.88  | 0.594 |
| Hypoxanthine                 | 1.19  | 0.884 |
| Ornithine                    | 0.995 | 0.900 |
| Isocitric acid + Citric acid | 1.09  | 0.479 |
| Cadaverine                   | 1.08  | 0.946 |
| Caffeine                     | 0.994 | 0.930 |
| 1,5-Anhydro glucitol         | 1.09  | 0.900 |
| Adenine                      | 1.18  | 0.410 |

|                         |       |       |
|-------------------------|-------|-------|
| Fructose                | 6.74  | 0.443 |
| Galactose               | 1.14  | 0.607 |
| Glucose                 | 0.912 | 0.884 |
| Lysine                  | 0.853 | 0.869 |
| Histidine               | 0.998 | 0.808 |
| Tyrosine                | 0.986 | 0.823 |
| Paraxanthine            | 1.03  | 0.854 |
| Indole-3-acetic acid    | 1.10  | 0.516 |
| N-Acetylmethionine      | 0.828 | 0.491 |
| Xanthine                | 1.06  | 0.823 |
| N-Acetylgalactosamine   | 1.10  | 0.808 |
| Uric acid               | 1.04  | 0.915 |
| Inositol                | 1.07  | 0.491 |
| Arabinose-5-phosphate   | 0.937 | 0.594 |
| Tryptophan              | 1.06  | 0.503 |
| Spermidine              | 0.968 | 0.961 |
| Fructose 6-phosphate    | 0.999 | 0.607 |
| N-Acetylneuraminic acid | 1.07  | 0.607 |
| $\beta$ -Lactose        | 0.953 | 0.455 |
| Maltose                 | 1.02  | 0.677 |
| Lactitol                | 0.963 | 0.793 |

<sup>a</sup>M/F: the ratio of the average fold changes between samples from male and female subjects

<sup>b</sup>The *p* values were calculated by the Mann-Whitney test.
